# Supplementary material for: Atypical IκB proteins – nuclear modulators of NF-κB signaling
Source: Springer Nature journal article supplement (doi:10.1186/1478-811x-11-23), 2013-04-11

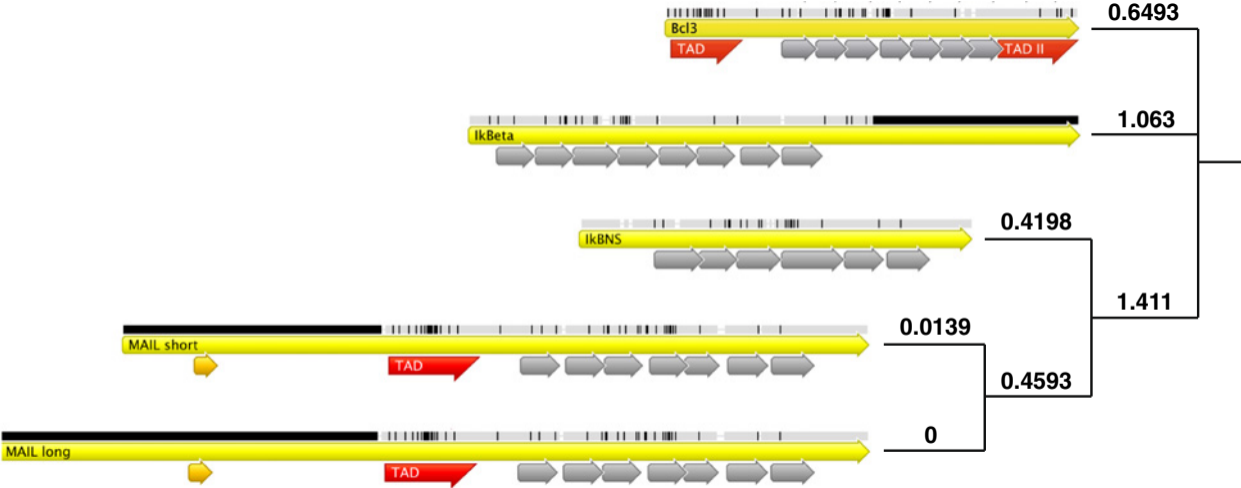

Supplement: 12964_2012_315_MOESM2_ESM.pdf [file 12964_2012_315_MOESM2_ESM.pdf]
